# Supplementary material for: Role of transition metal nanoparticles in the extra lithium storage capacity of transition metal oxides: a case study of hierarchical core–shell Fe3O4@C and Fe@C microspheres
Source: Royal Society of Chemistry journal article supplement (doi:10.1039/c3ta13233a), 2013-01-01
Supplement: c3ta13233a.pdf [file c3ta13233a.pdf]

## Electronic Supplementary Information (ESI)

# **Role of Transition Metal Nanoparticles in Extra Lithium Storage Capacity of Transition Metal Oxides: A Case Study of Hierarchical Core-Shell Fe<sub>3</sub>O<sub>4</sub>@C and Fe@C Microspheres**

Liwei Su<sup>a,b</sup>, Yiren Zhong<sup>a</sup> and Zhen Zhou<sup>a,\*</sup>

<sup>a</sup> Tianjin Key Laboratory of Metal and Molecule Based Material Chemistry, Key Laboratory of Advanced Energy Materials Chemistry (Ministry of Education), Institute of New Energy Material Chemistry, Synergetic Innovation Center of Chemical Science and Engineering (Tianjin), Nankai University, Tianjin 300071, China.

<sup>b</sup> State Key Laboratory Breeding Base of Green Chemistry-Synthesis Technology, College of Chemical Engineering and Material Science, Zhejiang University of Technology, Hangzhou, Zhejiang, 310032, China

Email: [zhouzhen@nankai.edu.cn](mailto:zhouzhen@nankai.edu.cn)

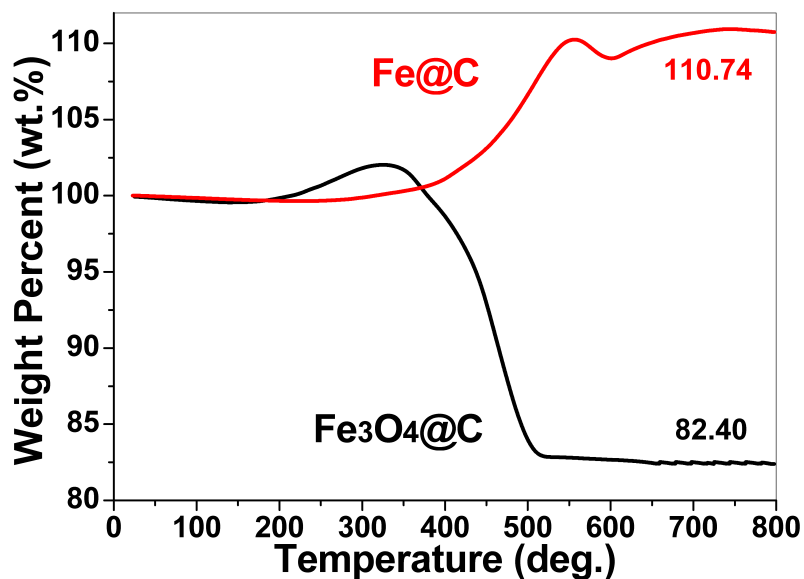

**Fig. S1.** Thermogravimetric analysis (TGA) of Fe<sub>3</sub>O<sub>4</sub>@C and Fe@C composites.

To confirm the carbon content in these composites and its corresponding contribution to lithium storage capacity, TGA was performed in air at 10 °C min<sup>-1</sup> (Fig. S1). After gradually heating up to 800 °C, the final weight percents of Fe<sub>3</sub>O<sub>4</sub>@C and Fe@C were 82.40 and 110.74 wt.%, respectively. During the heating process, two oxidation reactions happened at the same time. One was the oxidation of Fe<sub>3</sub>O<sub>4</sub> and Fe to Fe<sub>2</sub>O<sub>3</sub> to increase sample weight. The other was the oxidation of carbon shell to CO<sub>2</sub> leading to weight loss. Thus, we can roughly calculate the carbon contents in Fe<sub>3</sub>O<sub>4</sub>@C and Fe@C composites to be approximately 20.3 and 22.6 wt.%, respectively.

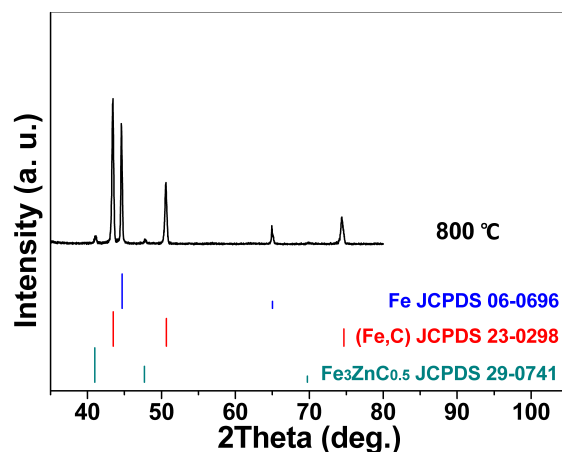

Fig. S2. XRD patterns of the final Fe@C composites.

Fig. S2 shows the XRD patterns of the heated samples at 800 °C. The peaks at 44.7° and 65.0° correspond to (110) and (200) planes of  $\alpha$ -Fe (JCPDS 06-0696, with the body-centered-cubic structure), while the peaks at 43.5°, 50.7°, and 74.7° are well assigned to (111), (200), and (220) planes of  $\gamma$ -Fe ((Fe, C) solid solution phase, JCPDS 23-0298, with the face-centered-cubic structure).<sup>1-4</sup> Besides, very weak peaks at 41.0°, 47.7°, and 69.8° are in agreement with the standard card of cubic  $\text{Fe}_3\text{ZnC}_{0.5}$  with space group of Pm-3m (JCPDS 29-0741). Note that, no other metals than Fe were introduced in the whole synthesis procedure; therefore, Fe atom should replace the position of Zn and the trace impurity should be  $\text{Fe}_8\text{C}$ .<sup>5-8</sup>

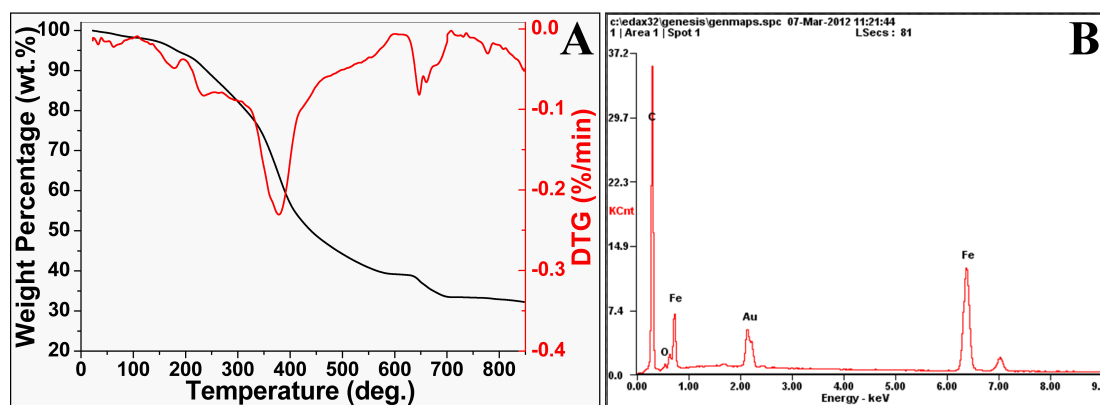

Fig. S3. TG curves of  $\text{Fe}_3\text{O}_4@\text{C}$  composites derived from the hydrothermal route before sintering at high temperatures (A). Electron diffraction spectra (EDS) of the final  $\text{Fe}@\text{C}$  composites (B).

TG measurements were performed in Ar atmosphere to confirm the phase transformation of the hydrothermal product along with the increasing temperatures (Fig. S2A). During the heating process, two dramatic drops were observed in the TG curve. The first drop before 550 °C corresponded to the loss of  $\text{H}_2\text{O}$  and the carbonization of carbaceous materials decomposed from the hydrothermal glucose solution. The second drop is located at around 650-700 °C, belonging to the oxygen loss from  $\text{Fe}_3\text{O}_4$  to  $\text{FeO}$  and  $\text{Fe}$ . The two platforms at the range of 550-650 °C and after 700 °C demonstrate the component stability of  $\text{Fe}_3\text{O}_4@\text{C}$  and  $\text{Fe}@\text{C}$  composites in the corresponding temperature range, respectively. A slight weight loss still exists in the TG curve after 800 °C. EDS was also performed to further confirm the oxygen content in the final  $\text{Fe}@\text{C}$  composites as 1.8 wt.% (Fig. S2B). Although it is difficult to remove the oxygen in  $\text{Fe}_3\text{O}_4@\text{C}$  composites completely, the existence of trace oxygen can contribute very little lithium storage based on the traditional conversion mechanism (Type III) and have no influence on the conclusion.

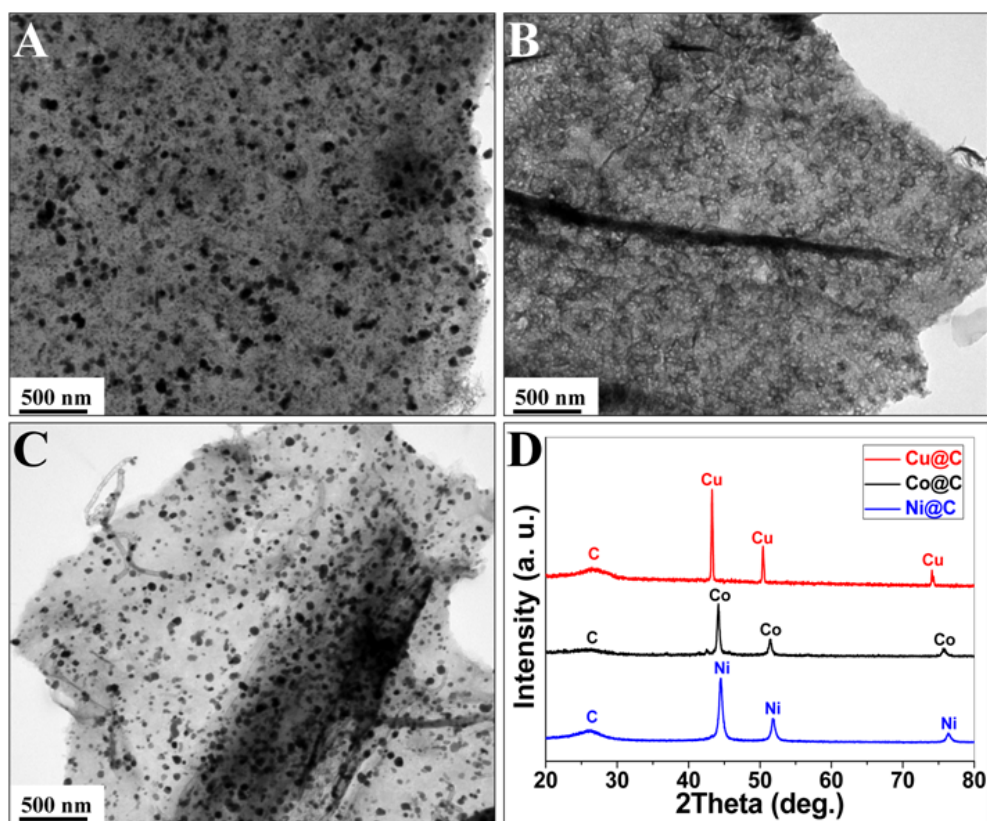

Fig. S4. TEM images of Co@C (A), Cu@C (B), Ni@C (C) composites and corresponding XRD patterns (D).

### Preparation of highly-dispersed Co@C, Cu@C, and Ni@C nanosheets

In a typical synthesis, 10.00 g urea, 1.00 citric acid, and 0.8 g metal chlorides were dissolved in the mixture solution of 150 mL ethanol and 50 mL distilled water with continuous stirring at 75 °C for ~3 h until the formation of gel, then transferred into an oven to keep 100 °C over night. The as-prepared solid mixture was sintered at high temperatures of 350 °C for 4 h and 650 °C for 10 h in Ar atmosphere. The obtained black products were grinded and stored for further characterization.

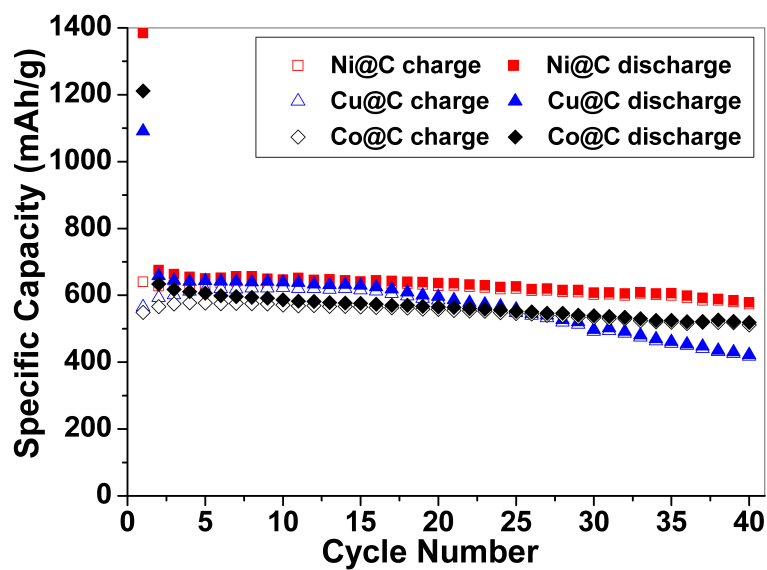

Fig. S5. Cycling performances of highly-dispersed Co@C, Cu@C and Ni@C electrodes at 200 mA g<sup>-1</sup>.

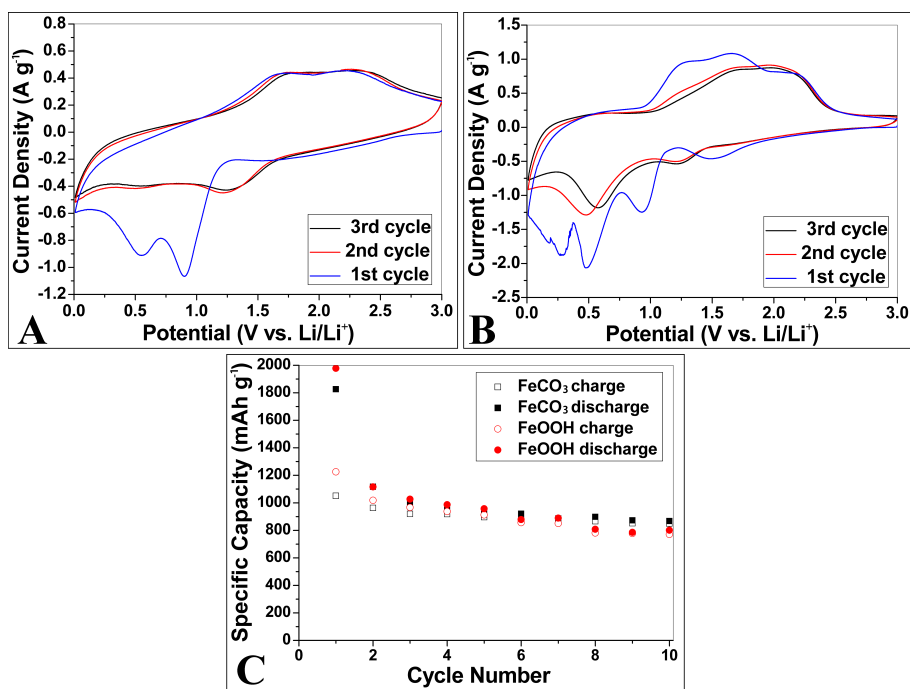

Fig. S6. CV curves of commercialized FeCO<sub>3</sub> (A) and FeOOH (B). Cycling performances of commercialized

FeCO<sub>3</sub> and FeOOH electrodes at 200 mA g<sup>-1</sup> (C).

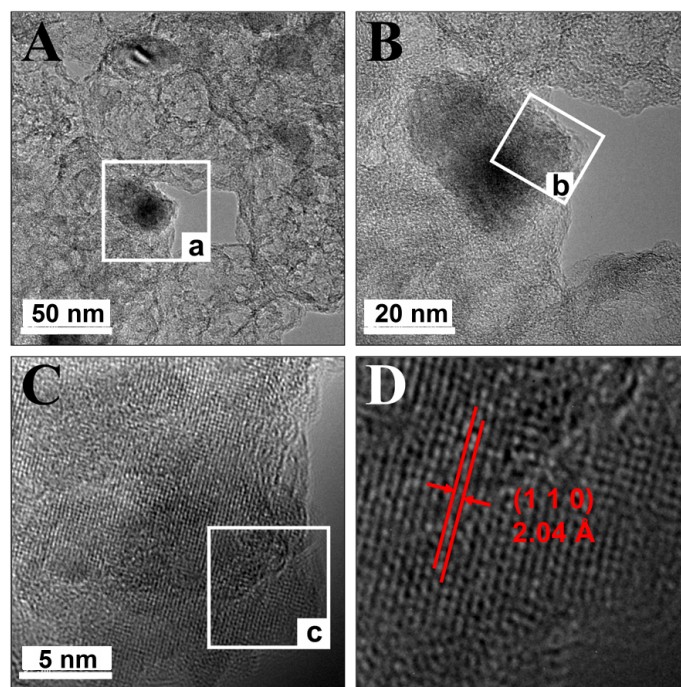

**Fig. S7.** HRTEM images of Fe@C electrodes after the initial charge. B, C and D correspond to the white region a, b and c, respectively.

1 **Table S1.** Extra capacity phenomenon of MOs and corresponding explanations reported in previous works.

| Active materials                                            | TC <sup>a</sup> of MOs<br>(mAh g <sup>-1</sup> ) | Tested capacity<br>(mAh g <sup>-1</sup> ) | Current density<br>(mA g <sup>-1</sup> ) | Cycling number | Explanation                                                                                   | Refs |
|-------------------------------------------------------------|--------------------------------------------------|-------------------------------------------|------------------------------------------|----------------|-----------------------------------------------------------------------------------------------|------|
| Mesoporous Fe <sub>3</sub> O <sub>4</sub> @C nanorods       | 928                                              | 1010 <sup>b</sup>                         | 92.8                                     | 50             | No explanation                                                                                | 9    |
| Graphene-coated hollow Fe <sub>3</sub> O <sub>4</sub>       | 928                                              | 900                                       | 50                                       | 50             | No explanation                                                                                | 10   |
| Graphene/Fe <sub>3</sub> O <sub>4</sub> aerogel             | 928                                              | 1100                                      | 200                                      | 50             | No explanation                                                                                | 11   |
| Graphene-encapsulated Fe <sub>3</sub> O <sub>4</sub>        | 928                                              | 950                                       | 35                                       | 85             | Reversible polymeric gel-like film                                                            | 12   |
| Fe <sub>3</sub> O <sub>4</sub> /graphene                    | 928                                              | 1000                                      | 2000                                     | 100            | Reversible polymeric gel like film                                                            | 13   |
| Fe <sub>3</sub> O <sub>4</sub> nanorods/SWCNT               | 928                                              | >1000                                     | 928                                      | 50             | Reversible polymeric gel-like film                                                            | 14   |
| Hollow porous Fe <sub>3</sub> O <sub>4</sub> beads/RGO      | 928                                              | 1039                                      | 100                                      | 170            | Reversible polymeric gel-like film                                                            | 15   |
| Fe <sub>3</sub> O <sub>4</sub> /C micro-flowers             | 928                                              | 1030                                      | 185                                      | 150            | Reversible polymeric gel like film<br>Possible interfacial lithium storage                    | 16   |
| Au-Co <sub>3</sub> O <sub>4</sub> nanowires                 | 890                                              | >1000                                     | 34                                       | 8              | Reversible polymeric gel-like film                                                            | 17   |
| Co <sub>3</sub> O <sub>4</sub> porous nanocapsules          | 890                                              | 1000                                      | 130                                      | 20             | Favorable features of unique nanostructures                                                   | 18   |
| Co <sub>3</sub> O <sub>4</sub> /graphene                    | 890                                              | 935                                       | 50                                       | 30             | Active graphene surface; grain Co <sub>3</sub> O <sub>4</sub> boundary                        | 19   |
| Co <sub>3</sub> O <sub>4</sub> /graphene                    | 890                                              | 1065                                      | 445                                      | 30             | Abundant nanocavities or defects of graphene;<br>Co <sub>3</sub> O <sub>4</sub> porous sheets | 20   |
| Co <sub>3</sub> O <sub>4</sub> nanorods/graphene            | 890                                              | 1090                                      | 1000                                     | 40             | No explanation                                                                                | 21   |
| Needlelike Co <sub>3</sub> O <sub>4</sub> nanotubes         | 890                                              | 918                                       | 50                                       | 30             | No explanation                                                                                | 22   |
| Mesoporous Co <sub>3</sub> O <sub>4</sub>                   | 890                                              | 1000                                      | 100                                      | 40             | No explanation                                                                                | 23   |
| Foam-like Co <sub>3</sub> O <sub>4</sub> nanosheets         | 890                                              | 900                                       | 178                                      | 10             | No explanation                                                                                | 24   |
| Mesoporous Co <sub>3</sub> O <sub>4</sub>                   | 890                                              | 1240                                      | 100                                      | 30             | No explanation                                                                                | 25   |
| Co <sub>3</sub> O <sub>4</sub> porous nanocages             | 890                                              | 1465                                      | 300                                      | 50             | No explanation                                                                                | 26   |
| 3D heterostructured Co <sub>3</sub> O <sub>4</sub> /RGO     | 890                                              | 1108                                      | 50                                       | 50             | High capacity of the porous RGO film                                                          | 27   |
| Porous Co <sub>3</sub> O <sub>4</sub> nanorod arrays        | 890                                              | ~1000                                     | 111                                      | 20             | Favorable features of unique nanostructures                                                   | 28   |
| Graphene-coated mesoporous Co <sub>3</sub> O <sub>4</sub>   | 890                                              | 1150                                      | 111                                      | 30             | Reversible SEI formation and dissolution                                                      | 29   |
| Hierarchical Co <sub>3</sub> O <sub>4</sub> microspheres    | 890                                              | 1000                                      | 89                                       | 50             | Favorable features of unique nanostructures                                                   | 30   |
| Single-crystalline Co <sub>3</sub> O <sub>4</sub> Nanobelts | 890                                              | 980                                       | 100                                      | 60             | Additional lithium storage in the grain boundaries                                            | 31   |
| Highly ordered mesoporous Co <sub>3</sub> O <sub>4</sub>    | 890                                              | 1200                                      | 50                                       | 100            | High surface area and porous structures                                                       | 32   |
| Co <sub>3</sub> O <sub>4</sub> nanocages                    | 890                                              | 970                                       | 50                                       | 30             | Interfaces and pores of the porous material                                                   | 33   |
| Mesoporous Co <sub>3</sub> O <sub>4</sub> nanoneedles       | 890                                              | 1079                                      | 150                                      | 50             | Robust mesoporous structure                                                                   | 34   |
| Hollow Co <sub>3</sub> O <sub>4</sub> nanorods              | 890                                              | 903                                       | 240                                      | 20             | Hollow, porous structure                                                                      | 35   |
| Self-stacked Co <sub>3</sub> O <sub>4</sub> nanosheets      | 890                                              | 107                                       | 178                                      | 50             | Nanosandwich structure                                                                        | 36   |



| Active materials                                             | TC of MOs (mAh g <sup>-1</sup> ) | Tested capacity (mAh g <sup>-1</sup> ) | Current density (mA g <sup>-1</sup> ) | Cycling number | Explanation                                                              | Refs |
|--------------------------------------------------------------|----------------------------------|----------------------------------------|---------------------------------------|----------------|--------------------------------------------------------------------------|------|
| $\alpha$ -Fe <sub>2</sub> O <sub>3</sub> hollow nanofibers   | 1005                             | 1293                                   | 60                                    | 40             | Pseudo-capacitance                                                       | 37   |
| Fe <sub>2</sub> O <sub>3</sub> @C nanocomposites             | 1005                             | 1210                                   | 100                                   | 50             | No explanation                                                           | 38   |
| Mesoporous CoO nanodisks                                     | 716                              | 1119                                   | 200                                   | 50             | No explanation                                                           | 39   |
| CoO quantum dot/graphene                                     | 716                              | 1008                                   | 1000                                  | 50             | No explanation                                                           | 40   |
| Porous carbon-modified MnO disks                             | 756                              | 1044                                   | 100                                   | 140            | No explanation                                                           | 41   |
| NiO/graphene                                                 | 718                              | 1098                                   | 100                                   | 50             | No explanation                                                           | 42   |
| 3D-hierarchical NiO-graphene                                 | 780                              | 1065                                   | 200                                   | 50             | High capacity of graphene                                                | 43   |
| NiO microspheres                                             | 718                              | >800                                   | 50                                    | 7              | Some unknown side reactions                                              | 44   |
| Mesoporous carbon/NiO                                        | 718                              | 1426 <sup>b</sup>                      | 1000                                  | 50             | Reversible polymeric gel-like film                                       | 45   |
| Nanostructure NiO                                            | 718                              | 746                                    | 154                                   | 10             | Reversible polymeric gel-like film                                       | 46   |
| Microscale cog-like CuO films                                | 674                              | 810                                    | 300                                   | 30             | Reversible polymeric gel-like film                                       | 47   |
| CuO/graphene                                                 | 674                              | 700                                    | 70                                    | 30             | High capacity of graphene                                                | 48   |
| Carbon coated ZnFe <sub>2</sub> O <sub>4</sub> nanoparticles | 1000                             | 1300                                   | 40                                    | 100            | Reversible polymeric gel-like film                                       | 49   |
| CoFe <sub>2</sub> O <sub>4</sub> /graphene sandwich          | 914                              | 1047 <sup>b</sup>                      | 200                                   | 160            | Synergistic effect between CoFe <sub>2</sub> O <sub>4</sub> and graphene | 50   |
| CoFe <sub>2</sub> O <sub>4</sub> /graphene                   | 914                              | 950                                    | 150                                   | 50             | No explanation                                                           | 51   |

1 <sup>a</sup> TC means the theoretical capacity of MOs. <sup>b</sup> This value is based on MOs, *i.e.*, C<sub>MOs</sub> calculated by Eqn. (1) in the manuscript, while  
 2 others are based on the overall mass of the corresponding sample.

3

4

5

6

1 **Table S2.** Components when discharge to ~0 V of different Fe-based anode materials and corresponding reduction/oxidation reactions and potential peaks in CV curves.

| Fe-based anodes                 | Components (cycled to ~0 V)                                                               | Reduction peaks (1 <sup>st</sup> discharge) | Reduction peaks after 1 <sup>st</sup> cycle                                                                                                                | Oxidation peaks     | Test conditions                                                                           | Refs                                       |                                                                                          |                                                                      |                |
|---------------------------------|-------------------------------------------------------------------------------------------|---------------------------------------------|------------------------------------------------------------------------------------------------------------------------------------------------------------|---------------------|-------------------------------------------------------------------------------------------|--------------------------------------------|------------------------------------------------------------------------------------------|----------------------------------------------------------------------|----------------|
|                                 |                                                                                           | 1.57 V                                      | Fe <sub>2</sub> O <sub>3</sub> to Li <sub>x</sub> Fe <sub>2</sub> O <sub>3</sub>                                                                           | 1.69 V              | Fe <sup>0</sup> to Fe <sup>2+</sup>                                                       | 0.2 mV s <sup>-1</sup>                     |                                                                                          |                                                                      |                |
| Fe <sub>2</sub> O <sub>3</sub>  | Fe <sup>0</sup> + Li <sub>2</sub> O + SEI                                                 | 0.93 V                                      | Fe <sup>3+</sup> to Fe <sup>2+</sup>                                                                                                                       | 0.65 V              | Fe <sup>3+</sup> to Fe <sup>0</sup>                                                       | 1 M LiPF <sub>6</sub> + EC/DMC/EMC (1:1:1) | 52                                                                                       |                                                                      |                |
|                                 |                                                                                           | 0.54 V                                      | Fe <sup>2+</sup> to Fe <sup>0</sup>                                                                                                                        | 1.95 V              | Fe <sup>2+</sup> to Fe <sup>3+</sup>                                                      |                                            |                                                                                          |                                                                      |                |
| FeO <sup>a</sup>                | Fe <sup>0</sup> + Li <sub>2</sub> O + SEI                                                 | 0.7 V                                       | Fe <sup>2+</sup> to Fe <sup>0</sup>                                                                                                                        | 1.0 V               | Fe <sup>2+</sup> to Fe <sup>0</sup>                                                       | ~1.6 V                                     | Fe <sup>0</sup> to Fe <sup>3+</sup>                                                      | 1 M LiPF <sub>6</sub> + EC/DMC (1:1)                                 | 53             |
| FeCO <sub>3</sub>               | Fe <sup>0</sup> + Li <sub>2</sub> O + Li <sub>2</sub> CO <sub>3</sub> + SEI               | 0.55 V<br>0.85 V                            | Fe <sup>2+</sup> to Fe <sup>0</sup> /Li <sub>2</sub> O/Li <sub>2</sub> CO <sub>3</sub>                                                                     | 1.3 V               | Fe <sup>0</sup> to Fe <sup>2+</sup><br>C <sup>x</sup> to C <sup>4+</sup>                  | 1.7 V<br>2.3 V                             | Fe <sup>0</sup> to Fe <sup>2+</sup><br>C <sup>x</sup> to C <sup>4+</sup>                 | 0.5 mV s <sup>-1</sup><br>1 M LiPF <sub>6</sub> + EC/DMC/EMC (1:1:1) | Fig. S6A<br>54 |
| FeC <sub>2</sub> O <sub>4</sub> | Fe <sup>0</sup> + Li <sub>2</sub> O + Li <sub>2</sub> C <sub>2</sub> O <sub>4</sub> + SEI | 1.21 V<br>0.76 V                            | FeC <sub>2</sub> O <sub>4</sub> to Fe <sup>0</sup> /Li <sub>2</sub> C <sub>2</sub> O <sub>4</sub>                                                          | 1.3 V               | FeC <sub>2</sub> O <sub>4</sub> to Fe <sup>0</sup>                                        | 1.3-1.9 V                                  | Fe <sup>0</sup> to Fe <sup>3+</sup>                                                      | 0.1 mV s <sup>-1</sup><br>1 M LiPF <sub>6</sub> + EC/DEC (1:1)       | 55             |
| FeF <sub>3</sub> <sup>a</sup>   | Fe <sup>0</sup> + LiF + SEI                                                               | 3.0 V                                       | FeF <sub>3</sub> to Li <sub>x</sub> FeF <sub>3</sub>                                                                                                       | -                   | -                                                                                         | 2.8 V                                      | Li <sub>x</sub> FeF <sub>3</sub> to Fe <sup>0</sup>                                      | 20 μV s <sup>-1</sup>                                                | 56             |
|                                 |                                                                                           | 1.8 V                                       | Li <sub>x</sub> FeF <sub>3</sub> to Fe <sup>0</sup>                                                                                                        | -                   | -                                                                                         | 3.25 V                                     | FeF <sub>3</sub> to Li <sub>x</sub> FeF <sub>3</sub>                                     | 1 M LiPF <sub>6</sub> + EC/DMC (1:1)                                 |                |
| FeOOH                           | Fe <sup>0</sup> + Li <sub>2</sub> O + LiOH + SEI                                          | 1.0 V<br>0.48 V<br>0.25 V                   | Fe <sup>3+</sup> to Fe <sup>0</sup> /Li <sub>2</sub> O/LiOH<br>SEI formation                                                                               | 1.25 V<br>0.6 V     | Fe <sup>3+</sup> to Fe <sup>0</sup> /Li <sub>2</sub> O/LiOH                               | 1.6-2.2 V                                  | Fe <sup>0</sup> to Fe <sup>3+</sup>                                                      | 0.5 mV s <sup>-1</sup><br>1 M LiPF <sub>6</sub> + EC/DMC/EMC (1:1:1) | Fig. S6B       |
| Fe <sub>3</sub> O <sub>4</sub>  | Fe <sup>0</sup> + Li <sub>2</sub> O + SEI                                                 | 0.8 V<br>0.55 V                             | Fe <sub>3</sub> O <sub>4</sub> to Li <sub>x</sub> Fe <sub>3</sub> O <sub>4</sub><br>Fe <sup>3+</sup> /Fe <sup>2+</sup> to Fe <sup>0</sup><br>SEI formation | 1.45 V<br>0.6-0.9 V | Fe <sup>3+</sup> /Fe <sup>2+</sup> to Fe <sup>0</sup><br>Reduction of some SEI components | 1.5-2.2 V                                  | Fe <sup>0</sup> → Fe <sup>2+</sup> /Fe <sup>3+</sup><br>Oxidation of some SEI components | 0.5 mV s <sup>-1</sup><br>1 M LiPF <sub>6</sub> + EC/DMC/EMC (1:1:1) | This work      |

---

|      |                       |           |                                           |        |                                                       |       |                                                      |                                            |           |
|------|-----------------------|-----------|-------------------------------------------|--------|-------------------------------------------------------|-------|------------------------------------------------------|--------------------------------------------|-----------|
| Fe@C | Fe <sup>0</sup> + SEI | 1.2 V     | Preliminary decomposition of electrolytes | 1.45 V | Fe <sup>3+</sup> /Fe <sup>2+</sup> to Fe <sup>0</sup> | 1.6 V | Fe <sup>0</sup> → Fe <sup>2+</sup> /Fe <sup>3+</sup> | 0.5 mV s <sup>-1</sup>                     | This work |
|      |                       |           |                                           | 0.95 V | Reduction of some SEI components                      | 1.9 V | Oxidation of some SEI components                     | 1 M LiPF <sub>6</sub> + EC/DMC/EMC (1:1:1) |           |
|      |                       | 0.3-0.8 V | SEI formation                             | 0.75 V |                                                       |       |                                                      |                                            |           |

---

1 “-” means that no explanation was given.

1 **Table S3.** Components when discharge to ~0 V of Fe<sub>3</sub>O<sub>4</sub> anode materials and corresponding reduction/oxidation reactions and potential peaks in CV curves.

| Fe-based anodes                    | Components (~0 V)                                           | Reduction peaks (1 <sup>st</sup> discharge) | Reduction peaks after 1 <sup>st</sup> cycle                                      | Oxidation peaks    | Test conditions                                                                  | Refs      |                                                       |                                      |
|------------------------------------|-------------------------------------------------------------|---------------------------------------------|----------------------------------------------------------------------------------|--------------------|----------------------------------------------------------------------------------|-----------|-------------------------------------------------------|--------------------------------------|
| Fe <sub>2</sub> O <sub>3</sub> /Fe | Fe <sup>0</sup> + Li <sub>2</sub> O + SEI                   | 1.6 V                                       | Fe <sub>2</sub> O <sub>3</sub> to Li <sub>x</sub> Fe <sub>2</sub> O <sub>3</sub> | 1.4 V              | Fe <sub>2</sub> O <sub>3</sub> to Li <sub>x</sub> Fe <sub>2</sub> O <sub>3</sub> | 0.5 V     |                                                       |                                      |
|                                    |                                                             | 0.8 V                                       | Fe <sup>3+</sup> /Fe <sup>2+</sup> to Fe <sup>2+</sup>                           | 0.8 V              | Fe <sup>3+</sup> /Fe <sup>2+</sup> to Fe <sup>2+</sup>                           | 1.5 V     | -                                                     |                                      |
|                                    |                                                             | 0.2 V                                       | SEI                                                                              | 0.2 V              | SEI                                                                              | 2.0 V     | 0.1 mV s <sup>-1</sup>                                |                                      |
| Fe <sub>2</sub> O <sub>3</sub> /Cu | Cu <sup>0</sup> + Fe <sup>0</sup> + Li <sub>2</sub> O + SEI | 0.2-1.2 V                                   |                                                                                  | 0.5 V              |                                                                                  | 1.0 V     | 1 M LiPF <sub>6</sub> + EC/DMC (1:1)                  |                                      |
|                                    |                                                             | 0.75 V                                      | -                                                                                | 1.3 V              | -                                                                                | 2.0 V     | -                                                     |                                      |
| Fe <sub>3</sub> O <sub>4</sub>     | Fe <sup>0</sup> + Li <sub>2</sub> O + SEI                   | 1.05 V                                      |                                                                                  | 1.6 V              |                                                                                  |           |                                                       |                                      |
|                                    |                                                             | 0.5 V                                       | Fe <sup>3+</sup> /Fe <sup>2+</sup> to Fe <sup>0</sup><br>SEI                     | 0.85 V             | -                                                                                | 1.2-1.9 V | Fe <sup>0</sup> to Fe <sup>3+</sup> /Fe <sup>2+</sup> | 0.1 mV s <sup>-1</sup>               |
| Ni/Fe <sub>3</sub> O <sub>4</sub>  | Ni <sup>0</sup> + Fe <sup>0</sup> + Li <sub>2</sub> O + SEI | 0.65 V                                      | Fe <sup>3+</sup> /Fe <sup>2+</sup> to Fe <sup>0</sup><br>SEI                     | 1.5 V<br>0.6-0.8 V | -                                                                                | 1.6-2.2 V | Fe <sup>0</sup> to Fe <sup>3+</sup> /Fe <sup>2+</sup> | 1 M LiPF <sub>6</sub> + EC/DMC (1:1) |
| C                                  | Li <sub>x</sub> C + SEI                                     | 0-0.8 V                                     | C to Li <sub>x</sub> C SEI                                                       | No peaks           | -                                                                                | No peaks  | -                                                     | 0.1 mV s <sup>-1</sup>               |
| Ni/C                               | Ni <sub>0</sub> + Li <sub>x</sub> C + SEI                   | 1.6 V                                       | Preliminary decomposition of electrolytes                                        |                    |                                                                                  | 1.2 V     | Reversible                                            | 1 M LiPF <sub>6</sub> + EC/DMC/EMC   |
|                                    |                                                             | 0.6 V                                       | Formation of SEI films                                                           | No peaks           | -                                                                                | 1.6-2.5 V | oxidation of some SEI components                      | (1:1:1)                              |

2 “-” means that no explanation was given.

## 1 References

- 2 1. X.-C. Sun and N. Nava, *Nano Lett.*, 2002, **2**, 765-769.
- 3 2. P.-Z. Si, Z.-D. Zhang, D.-Y. Geng, C.-Y. You, X.-G. Zhao and W.-S. Zhang, *Carbon*,  
4 2003, **41**, 247-251.
- 5 3. X. L. Dong, Z. D. Zhang, Q. F. Xiao, X. G. Zhao and Y. C. Chuang, *J. Mater. Sci.*, 1998,  
6 **33**, 1915-1919.
- 7 4. H. G. Kim, S. Z. Han, K. Euh and S. H. Lim, *Mater. Sci. Eng. A*, 2011, **530**, 652-658.
- 8 5. G. L. Weerasinghe, R. Needs and C. Pickard, *Phys. Rev. B*, 2011, **84**, 174110.
- 9 6. A. N. Timoshevskii, V. A. Timoshevskii and B. Z. Yanchitsky, *J. Phys. Condens. Mat.*,  
10 2001, **13**, 1051-1061.
- 11 7. E. L. Peltzer, Y. Blancá, J. Desimoni and N. E. Christensen, *Hyperfine Interact.*, 2006,  
12 **161**, 197-202.
- 13 8. S. Nasu, T. Takano and F. E. Fujita, *Hyperfine Interact.*, 1986, **28**, 1071-1074.
- 14 9. S. M. Yuan, J. X. Li, L. T. Yang, L. W. Su, L. Liu and Z. Zhou, *ACS Appl. Mater.*  
15 *Interfaces*, 2011, **3**, 705-709.
- 16 10. D. Chen, G. Ji, Y. Ma, J. Y. Lee and J. Lu, *ACS Appl. Mater. Interfaces*, 2011, **3**,  
17 3078-3083.
- 18 11. W. Chen, S. Li, C. Chen and L. Yan, *Adv. Mater.*, 2011, **23**, 5679-5683.
- 19 12. G. Zhou, D.-W. Wang, F. Li, L. Zhang, N. Li, Z.-S. Wu, L. Wen, G. Q. Lu and H.-M.  
20 Cheng, *Chem. Mater.*, 2010, **22**, 5306-5313.
- 21 13. S. K. Behera, *Chem. Commun.*, 2011, **47**, 10371-10373.
- 22 14. C. Ban, Z. Wu, D. T. Gillaspie, L. Chen, Y. Yan, J. L. Blackburn and A. C. Dillon, *Adv.*  
23 *Mater.*, 2010, **22**, E145-E149.
- 24 15. Y. Chen, B. Song, X. Tang, L. Lu and J. Xue, *J. Mater. Chem.*, 2012, **22**, 17656-17662.
- 25 16. S. Jin, H. Deng, D. Long, X. Liu, L. Zhan, X. Liang, W. Qiao and L. Ling, *J. Power*  
26 *Sources*, 2011, **196**, 3887-3893.
- 27 17. K. T. Nam, D. W. Kim, P. J. Yoo, C. Y. Chiang, N. Meethong, P. T. Hammond, Y. M.  
28 Chiang and A. M. Belcher, *Science*, 2006, **312**, 885-888.
- 29 18. J. Liu, H. Xia, L. Lu and D. Xue, *J. Mater. Chem.*, 2010, **20**, 1506-1511.
- 30 19. Z. S. Wu, W. C. Ren, L. Wen, L. B. Gao, J. P. Zhao, Z. P. Chen, G. M. Zhou, F. Li and  
31 H. M. Cheng, *ACS Nano*, 2010, **4**, 3187-3194.
- 32 20. S. Q. Chen and Y. Wang, *J. Mater. Chem.*, 2010, **20**, 9735-9739.
- 33 21. L. Tao, J. Zai, K. Wang, H. Zhang, M. Xu, J. Shen, Y. Su and X. Qian, *J. Power Sources*,  
34 2012, **202**, 230-235.
- 35 22. X. W. Lou, D. Deng, J. Y. Lee, J. Feng and L. A. Archer, *Adv. Mater.*, 2008, **20**,  
36 258-262.
- 37 23. K. M. Shaju, F. Jiao, A. Debart and P. G. Bruce, *Phys. Chem. Chem. Phys.*, 2007, **9**,  
38 1837-1842.
- 39 24. Y. Fan, H. Shao, J. Wang, L. Liu, J. Zhang and C. Cao, *Chem. Commun.*, 2011, **47**,  
40 3469-3471.
- 41 25. S. Xiong, J. S. Chen, X. W. Lou and H. C. Zeng, *Adv. Funct. Mater.*, 2012, **22**, 861-871.
- 42 26. L. Hu, N. Yan, Q. Chen, P. Zhang, H. Zhong, X. Zheng, Y. Li and X. Hu, *Chem. Eur. J.*,  
43 2012, **18**, 8971-8977.
- 44 27. B. G. Choi, S. J. Chang, Y. B. Lee, J. S. Bae, H. J. Kim and Y. S. Huh, *Nanoscale*, 2012,  
45 **4**, 5924-5930.

- 1 28. W. Mei, J. Huang, L. Zhu, Z. Ye, Y. Mai and J. Tu, *J. Mater. Chem.*, 2012, **22**,  
2 9315-9321.
- 3 29. W. Yue, Z. Lin, S. Jiang and X. Yang, *J. Mater. Chem.*, 2012, **22**, 16318-16322.
- 4 30. B. Guo, C. S. Li and Z. Y. Yuan, *J. Phys. Chem. C*, 2010, **114**, 12805-12817.
- 5 31. H. Huang, W. Zhu, X. Tao, Y. Xia, Z. Yu, J. Fang, Y. Gan and W. Zhang, *ACS Appl.*  
6 *Mater. Interfaces*, 2012, **4**, 5974-5980.
- 7 32. G. X. Wang, H. Liu, J. Horvat, B. Wang, S. Z. Qiao, J. Park and H. Ahn, *Chem. Eur. J.*,  
8 2010, **16**, 11020-11027.
- 9 33. N. Yan, L. Hu, Y. Li, Y. Wang, H. Zhong, X. Hu, X. Kong and Q. Chen, *J. Phys. Chem.*  
10 *C*, 2012, **116**, 7227-7235.
- 11 34. X. W. Lou, D. Deng, J. Y. Lee and L. A. Archer, *J. Mater. Chem.*, 2008, **18**, 4397-4401.
- 12 35. H.-W. Shim, Y.-H. Jin, S.-D. Seo, S.-H. Lee and D.-W. Kim, *ACS Nano*, 2011, **5**,  
13 443-449.
- 14 36. X. Wang, H. Guan, S. Chen, H. Li, T. Zhai, D. Tang, Y. Bando and D. Golberg, *Chem.*  
15 *Commun.*, 2011, **47**, 12280-12282.
- 16 37. S. Chaudhari and M. Srinivasan, *J. Mater. Chem.*, 2012, **22**, 23049-23056.
- 17 38. S.-L. Chou, J.-Z. Wang, D. Wexler, K. Konstantinov, C. Zhong, H.-K. Liu and S.-X.  
18 Dou, *J. Mater. Chem.*, 2010, **20**, 2092-2098.
- 19 39. Y. Sun, X. Hu, W. Luo and Y. Huang, *J. Mater. Chem.*, 2012, **22**, 13826-13833.
- 20 40. C. Peng, B. Chen, Y. Qin, S. Yang, C. Li, Y. Zuo, S. Liu and J. Yang, *ACS Nano*, 2012,  
21 **6**, 1074-1081.
- 22 41. Y. Sun, X. Hu, W. Luo and Y. Huang, *J. Mater. Chem.*, 2012, **22**, 19190-19195.
- 23 42. Y. Huang, X.-l. Huang, J.-s. Lian, D. Xu, L.-m. Wang and X.-b. Zhang, *J. Mater. Chem.*,  
24 2012, **22**, 2844-2847.
- 25 43. L. Tao, J. Zai, K. Wang, Y. Wan, H. Zhang, C. Yu, Y. Xiao and X. Qian, *RSC Adv.*,  
26 2012, **2**, 3410-3415.
- 27 44. L. Liu, Y. Li, S. M. Yuan, M. Ge, M. M. Ren, C. S. Sun and Z. Zhou, *J. Phys. Chem. C*,  
28 2010, **114**, 251-255.
- 29 45. M.-Y. Cheng and B.-J. Hwang, *J. Power Sources*, 2010, **195**, 4977-4983.
- 30 46. X. Wang, X. Li, X. Sun, F. Li, Q. Liu, Q. Wang and D. He, *J. Mater. Chem.*, 2011, **21**,  
31 3571-3573.
- 32 47. W. Zhang, M. Li, Q. Wang, G. Chen, M. Kong, Z. Yang and S. Mann, *Adv. Funct.*  
33 *Mater.*, 2011, **21**, 3516-3523.
- 34 48. L. Q. Lu and Y. Wang, *J. Mater. Chem.*, 2011, **21**, 17916-17921.
- 35 49. D. Bresser, E. Paillard, R. Kloepsch, S. Krueger, M. Fiedler, R. Schmitz, D. Baither, M.  
36 Winter and S. Passerini, *Adv. Energy Mater.*, 2013, **3**, 513-523.
- 37 50. S. Liu, J. Xie, C. Fang, G. Cao, T. Zhu and X. Zhao, *J. Mater. Chem.*, 2012, **22**,  
38 19738-19743.
- 39 51. Y. Zhao, J. Li, Y. Ding and L. Guan, *J. Mater. Chem.*, 2011, **21**, 19101-19105.
- 40 52. G. Zhou, D.-W. Wang, P.-X. Hou, W. Li, N. Li, C. Liu, F. Li and H.-M. Cheng, *J. Mater.*  
41 *Chem.*, 2012, **22**, 17942-17947.
- 42 53. P. Poizot, S. Laruelle, S. Grugeon, L. Dupont and J. M. Tarascon, *Nature*, 2000, **407**,  
43 496-499.
- 44 54. L. Su, Z. Zhou, X. Qin, Q. Tang, D. Wu and P. Shen, *Nano Energy*, 2012, **2**, 276-282.
- 45 55. W. A. Ang, N. Gupta, R. Prasanth and S. Madhavi, *ACS Appl. Mater. Interfaces*, 2012, **4**,  
46 7011-7019.

- 1 56. P. Liu, J. J. Vajo, J. S. Wang, W. Li and J. Liu, *J. Phys. Chem. C*, 2012, **116**, 6467-6473.
- 2 57. K. Xie, Z. Lu, H. Huang, W. Lu, Y. Lai, J. Li, L. Zhou and Y. Liu, *J. Mater. Chem.*,  
3 2012, **22**, 5560-5567.
- 4 58. Q.-q. Xiong, J.-p. Tu, Y. Lu, J. Chen, Y.-x. Yu, X.-l. Wang and C.-d. Gu, *J. Mater.*  
5 *Chem.*, 2012, **22**, 18639-18646.
- 6 59. L. Su, Z. Zhou and P. Shen, *J. Phys. Chem. C*, 2012, **116**, 23974-23980.
